# Supplementary material for: On the structure of Ce-containing silicophosphate glasses: a core–shell molecular dynamics investigation
Source: Royal Society of Chemistry journal article supplement (doi:10.1039/c4cp02577f), 2014-01-01
Supplement: c4cp02577f1.pdf [file c4cp02577f1.pdf]

## **SUPPORTING INFORMATION**

# **On the Structure of Ce-containing Silicophosphate Glasses: a Core-Shell Molecular Dynamics Investigation.**

*Elisa Gambuzzi and Alfonso Pedone\**

Dipartimento di Scienze Chimiche e Geologiche, Università degli Studi di Modena e Reggio Emilia  
via G. Campi, 183; 41125 Modena (Italy)

**Table S1.** Comparison between the experimental densities ( $\rho_{\text{exp}}$ )<sup>1</sup> and the ones computed with the PRIVEN method ( $\rho_{\text{PRIVEN}}$ ) and after NPT MD simulations at 300K ( $\rho_{\text{NPT}}$ ). The percentage difference between  $\rho_{\text{exp}}$  and  $\rho_{\text{NPT}}$  is also reported.

| Glass | $\rho_{\text{exp}}$ (g/cc) | $\rho_{\text{PRIVEN}}$ (g/cc) | $\rho_{\text{NPT}}$ (g/cc) | $[(\rho_{\text{NPT}} - \rho_{\text{exp}})/\rho_{\text{exp}}] \cdot 100$ |
|-------|----------------------------|-------------------------------|----------------------------|-------------------------------------------------------------------------|
| CSP2  | 2.58 ( $\pm 0.01$ )        | 2.54                          | 2.50                       | - 3.10 %                                                                |
| CSP3  | 2.70 ( $\pm 0.01$ )        | 2.66                          | 2.61                       | - 3.33 %                                                                |
| CSP4  | 2.80 ( $\pm 0.01$ )        | 2.83                          | 2.73                       | - 2.50 %                                                                |
| CSP6  | 2.98 ( $\pm 0.01$ )        | 3.30                          | 3.15                       | + 5.70 %                                                                |
| CSP9  | 3.08 ( $\pm 0.02$ )        | 3.36                          | 3.19                       | + 3.57 %                                                                |

**Table S2.** Coordination number distributions of  $\text{Ce}^{3+}$  and  $\text{Ce}^{4+}$  calculated on 3 simulation boxes per composition (standard deviations in parenthesis).

|                  | 5        | 6          | 7          | 8          | 9         |
|------------------|----------|------------|------------|------------|-----------|
| $\text{Ce}^{3+}$ |          |            |            |            |           |
| CSP2             | 5.3(0.8) | 37.0(13.3) | 45.9(11.4) | 11.7(4.4)  | 0.1 (0.4) |
| CSP3             | 5.6(4.4) | 41.6(5.5)  | 45.1(4.3)  | 7.2(5.5)   | 0.2(0.1)  |
| CSP4             | 7.6(2.5) | 43.6(4.3)  | 39.7(0.9)  | 8.6(2.8)   | 0.5(0.1)  |
| CSP6             | 7.2(1.9) | 40.4(0.3)  | 42.0 (1.3) | 9.5(1.7)   | 0.9 (0.1) |
| CSP9             | 5.8(1.2) | 44.7(4.1)  | 38.5 (3.4) | 9.6(2.8)   | 1.4 (0.5) |
| $\text{Ce}^{4+}$ |          |            |            |            |           |
| CSP6             | 0.0(0.0) | 0.0(0.0)   | 66.7(11.3) | 33.3(4.1)  | 0.0(0.0)  |
| CSP9             | 0.0(0.0) | 0.0(0.0)   | 34.4(10.6) | 65.5(10.5) | 0.1(0.1)  |

**Table S3.**  $Q^n$  species distributions of P and Si. Populations are given in percentage (pop. %) with respect to the total number of P or Si in the models.

|      | $Q^0$    | $Q^1$     | $Q^2$     | $Q^3$     | $Q^4$     |
|------|----------|-----------|-----------|-----------|-----------|
| P    |          |           |           |           |           |
| CSP2 | 0.0      | 0.7(0.1)  | 33.2(2.5) | 60.2(3.1) | 4.9(0.4)  |
| CSP3 | 0.4(0.1) | 2.3(0.3)  | 45.2(1.3) | 49.1(0.2) | 2.3(0.5)  |
| CSP4 | 0.7(0.1) | 4.9(0.5)  | 53.8(0.3) | 38.8(1.5) | 1.1(0.9)  |
| CSP6 | 1.9(0.4) | 14.2(1.2) | 67.9(2.5) | 15.2(0.5) | 0.0(0.0)  |
| CSP9 | 2.2(0.3) | 16.7(1.4) | 69.0(3.9) | 10.7(1.7) | 0.0(0.0)  |
| Si   |          |           |           |           |           |
| CSP2 | 0.0(0.0) | 0.0(0.0)  | 0.0(0.0)  | 4.7(1.0)  | 89.5(1.6) |
| CSP3 | 0.0(0.0) | 0.0(0.0)  | 0.0(0.0)  | 6.5(0.5)  | 91.2(1.1) |
| CSP4 | 0.0(0.0) | 0.0(0.00) | 0.0(0.00) | 5.2(0.1)  | 90.7(0.3) |
| CSP6 | 0.0(0.0) | 0.0(0.0)  | 0.0(0.0)  | 5.2(3.9)  | 90.8(4.0) |

**Table S4.** Average number  $n$  of BOs bonded to P atoms,  $\bar{n}_{P(Qn)}$ , Ce<sub>2</sub>O<sub>3</sub> content, Si/P, Ce/P ratios and the average number of NBOs bonded to P and available for Ce coordination, NBO<sup>P</sup>/Ce.

| Glasses | $n_{P(Qn)}$ | Ce <sub>2</sub> O <sub>3</sub> (mol%) | Si/P  | Ce/P | NBO <sup>P</sup> /Ce |
|---------|-------------|---------------------------------------|-------|------|----------------------|
| CSP2    | 2.7         | 2.2                                   | 0.867 | 0.06 | 16.61                |
| CSP3    | 2.5         | 4.1                                   | 0.711 | 0.11 | 11.08                |
| CSP4    | 2.3         | 7.5                                   | 0.508 | 0.17 | 8.29                 |
| CSP6    | 2.0         | 18.2                                  | 0.140 | 0.29 | 6.10                 |
| CSP9    | 1.9         | 28.3                                  | 0.004 | 0.33 | 6.15                 |

**Table S5.**  $R_P^{P/Si}$  and  $R_{Si}^{P/Si}$  values as a function of the  $n^\circ\text{Ce}/(n^\circ\text{P}+n^\circ\text{Si})$  ratio, which characterizes each composition.

| $n^\circ\text{Ce}/(n^\circ\text{P}+n^\circ\text{Si})$ | $R_P^{P/Si}$ | $R_{Si}^{P/Si}$ |
|-------------------------------------------------------|--------------|-----------------|
| 0.03 (CSP2)                                           | 0.492        | 0.864           |
| 0.06 (CSP3)                                           | 0.496        | 0.828           |
| 0.11 (CSP4)                                           | 0.507        | 0.713           |
| 0.25 (CSP6)                                           | 0.495        | 0.606           |

**Table S6.** Populations of Q<sup>*n*</sup> sites (4-coordinated former cations bonded to  $n$  bridging oxygens), 5-coordinated (P<sup>5</sup>) and 6-coordinated (H<sup>6</sup>) former cations in the CSP models. Comparing Rigid ion and Core Shell output data of statistical analysis performed as mentioned in the *Method* section.

|            | Q <sup>0</sup> | Q <sup>1</sup> | Q <sup>2</sup> | Q <sup>3</sup> | Q <sup>4</sup> | P <sup>5</sup> | H <sup>6</sup> |
|------------|----------------|----------------|----------------|----------------|----------------|----------------|----------------|
| Si         |                |                |                |                |                |                |                |
| Rigid ion  | 0.0            | 0.0            | 0.3            | 12.0           | 83.3           | 4.4            | 0.0            |
| Core-Shell | 0.0            | 0.0            | 0.0            | 6.9            | 89.2           | 3.9            | 0.0            |
| P          |                |                |                |                |                |                |                |
| Rigid ion  | 0.3            | 2.9            | 29.9           | 49.8           | 16.5           | 0.5            | 0.0            |
| Core shell | 0.4            | 3.5            | 59.7           | 35.7           | 0.7            | 0.0            | 0.0            |

**Table S7.** Comparison of  $Q^n$  site population of the CaO-P<sub>2</sub>O<sub>5</sub> glass determined by NMR experiments, rigid ion and core-shell MD simulations.

|                           | Q <sup>0</sup> | Q <sup>1</sup> | Q <sup>2</sup> | Q <sup>3</sup> | Q <sup>4</sup> |
|---------------------------|----------------|----------------|----------------|----------------|----------------|
| Experimental <sup>2</sup> | 0              | 4              | 96             | 0              | 0              |
| Rigid ion                 | 1              | 23             | 51             | 21             | 5              |
| Core shell                | 0              | 11             | 80             | 9              | 0              |

**Table S8.** Description of the second coordination shells of Ce<sup>3+</sup> and Ce<sup>4+</sup> by the Rigid ion<sup>3</sup> and the Core Shell (this work) models. Cutoff distances for coordination numbers are the same adopted by Du et al<sup>3</sup>: 4.37/4.00 Å for Ce<sup>3+</sup>/Ce<sup>4</sup>.

|            | Ce <sup>3+</sup> |     | Ce <sup>4+</sup> |     |
|------------|------------------|-----|------------------|-----|
|            | Si               | P   | Si               | P   |
| Rigid Ion  | 1.2              | 5.7 | 1.2              | 4.9 |
| Core shell | 0.4              | 6.4 | 1.0              | 6.8 |

**Table S9.** Analysis of Ce<sup>3+</sup> second coordination sphere within a 5.00 Å radius cutoff. Coordination numbers with respect to P, ( $CN_{Ce}^P$ ), Si, ( $CN_{Ce}^{Si}$ ), and Al, ( $CN_{Ce}^{Al}$ ) versus the amount of Ce<sub>2</sub>O<sub>3</sub> (mol %) in the composition.

| Ce <sub>2</sub> O <sub>3</sub> mol % | $CN_{Ce}^P$      | $CN_{Ce}^{Si}$ | $CN_{Ce}^{Al}$ |
|--------------------------------------|------------------|----------------|----------------|
|                                      | Ce <sup>3+</sup> |                |                |
| 2.2 (CSP2)                           | 7.99(0.26)       | 1.30(0.12)     | 0.08(0.05)     |
| 4.1 (CSP3)                           | 7.91(0.15)       | 1.56(0.07)     | 0.12(0.06)     |
| 7.5 (CSP4)                           | 8.22(0.15)       | 1.28(0.14)     | 0.10(0.10)     |
| 18.2 (CSP6)                          | 8.93(0.03)       | 0.64(0.02)     | 0.13(0.01)     |
| 23.8 (CSP9)                          | 8.71(0.42)       | 0.00(0.00)     | 0.16(0.02)     |

**Table S10.** The relative percentage population, pop. %, of Ce clusters containing  $m$  Ce atoms.

| $M$       | Pop % |      |      |      |      |
|-----------|-------|------|------|------|------|
|           | CSP2  | CSP3 | CSP4 | CSP6 | CSP9 |
| 1         | 95.5  | 92.8 | 84.8 | 60.4 | 60.8 |
| 2         | 4.5   | 5.8  | 7.6  | 18.9 | 20.1 |
| 3         | 0.0   | 1.4  | 4.8  | 11.0 | 8.4  |
| 4         | 0.0   | 0.0  | 2.8  | 5.5  | 3.4  |
| 5         | 0.0   | 0.0  | 0.0  | 2.4  | 1.6  |
| 6         | 0.0   | 0.0  | 0.0  | 0.6  | 1.6  |
| 7         | 0.0   | 0.0  | 0.0  | 0.0  | 1.1  |
| 8         | 0.0   | 0.0  | 0.0  | 0.6  | 0.6  |
| 9         | 0.0   | 0.0  | 0.0  | 0.0  | 0.0  |
| 10        | 0.0   | 0.0  | 0.0  | 0.0  | 0.6  |
| 11        | 0.0   | 0.0  | 0.0  | 0.0  | 0.6  |
| 12        | 0.0   | 0.0  | 0.0  | 0.0  | 0.0  |
| 13        | 0.0   | 0.0  | 0.0  | 0.0  | 0.6  |
| 14        | 0.0   | 0.0  | 0.0  | 0.6  | 0.6  |
| $\bar{m}$ | 1.05  | 1.09 | 1.26 | 1.76 | 1.99 |

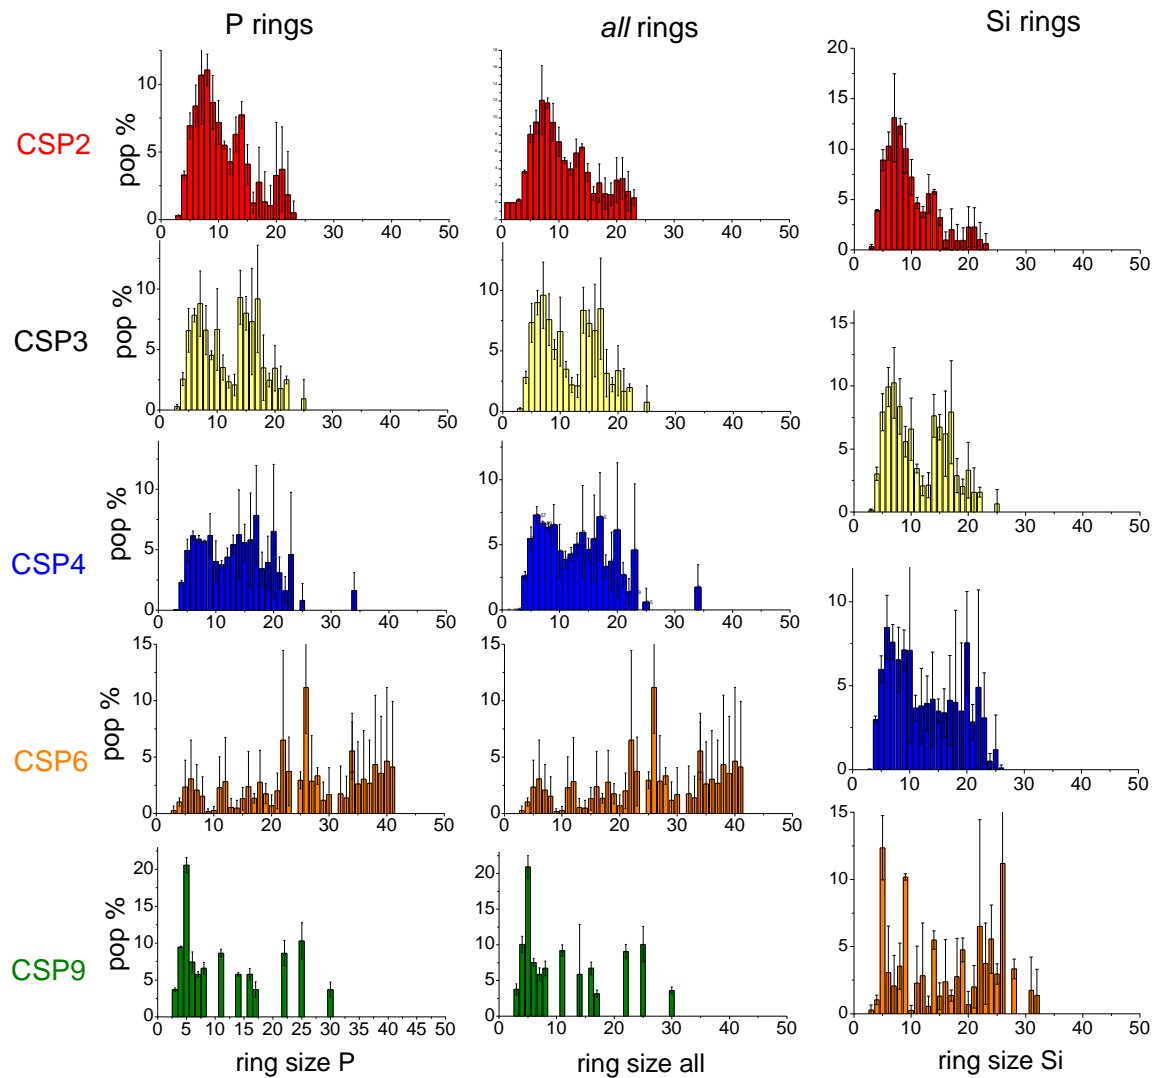

**Figure S1.** Ring size analysis for Si (CSP2, CSP3, CSP4, CSP6), P (all glasses) and *all* formers without distinction. Different colors mean different compositions. Si rings analysis for CSP9 was omitted because of the small amount of SiO<sub>2</sub> in the glass.

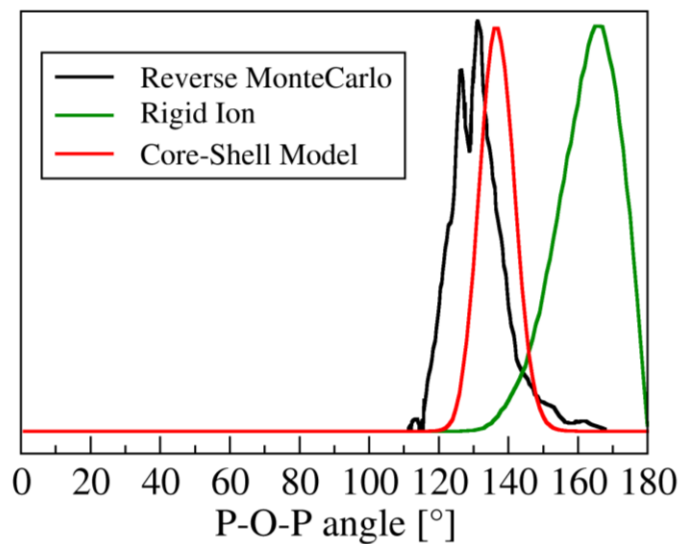

**Figure S2.** The P-O-P intertetrahedral angle distributions of the CaO-P<sub>2</sub>O<sub>5</sub> glass obtained with a Reverse Monte Carlo approach on diffraction data<sup>4</sup> is compared to those provided by the RI model (green curves) and the CS model (red curves).

## Bibliography

- (1) Rygel, J. L. Cerium clustering and radiation damage resistance in aluminophosphate and silicophosphate glasses. PhD. Thesis . The Pennsylvania State University.
- (2) Pickup, D. M.; Ahmed, I.; Guerry, P.; Knowles, J. C.; Smith, M. E.; Newport, R. J. The structure of phosphate glass biomaterials from neutron diffraction and  $^{31}\text{P}$  nuclear magnetic resonance data. *J. Phys.: Condens. Mat.* **2007**, *19* (14), 415116-415116.
- (3) Du, J.; Kokou, L.; Rygel, J. L.; Chen, Y.; Pantano, C. G.; Woodman, R.; Belcher, J. Structure of Ce phosphate glasses: molecular dynamics simulation. *J. Am. Cer. Soc.* **2011**, *94* (8), 2393-2401.
- (4) Wetherall, K. M.; Pickup, D. M.; Newport, R. J.; Mountjoy, G. The structure of calcium metaphosphate glass obtained from x-ray and neutron diffraction and reverse Monte Carlo modelling. *J. Phys.: Condens. Mat.* **2009**, *21* (3), 035109.
